# Supplementary material for: An ST131 clade and a phylogroup A clade bearing an O101-like O-antigen cluster predominate among bloodstream Escherichia coli isolates from South-West Nigeria hospitals
Source: PubMed Central journal article supplement (PMC9837563; doi:10.1099/mgen.0.000863), 2022-12-16
Supplement: mgen-8-863-s001.pdf [file mgen-8-863-s001.pdf]

**Title. An ST131 clade and a Phylogroup A clade bearing O101-like O-antigen cluster predominate among bloodstream *Escherichia coli* isolates from southwest Nigeria hospitals.**

Ayorinde O. Afolayan, Aaron O. Aboderin, Anderson O. Oaikhena, Erkison Ewomazino Odih, Veronica O. Ogunleye, Adeyemi T. Adeyemo, Abolaji T. Adeyemo, Oyeniya S. Bejide, Anthony Underwood, Silvia Argimón, Monica Abrudan, Abiodun Egwuenu, Chikwe Ihekweazu, David M. Aanensen and Iruka N. Okeke

Supplementary data files

Table S1 is a spreadsheet containing epidemiological data, antimicrobial susceptibility data, and *in silico* data (AMR, virulence, plasmids, serotype, fimtype, phylogroup)

**Table S2: Summary of Antibiotic Susceptibility Test data showing the number of *E. coli* isolates that were resistant to the named antibiotics.**

| Drug class                      | Drug                                | Resistance % (resistance (n)/species (n)) |
|---------------------------------|-------------------------------------|-------------------------------------------|
| Aminoglycosides                 | Gentamicin (GEN)                    | 55.20% (37/67)                            |
| Beta-lactams/penicillins        | Ampicillin (AMP)                    | 92.50% (62/67)                            |
|                                 | Piperacillin/Tazobactam (TZP)       | 17.90% (12/67)                            |
| Cephalosporins (2nd generation) | Cefuroxime (CXM)                    | 50.70% (34/67)                            |
|                                 | Cefuroxime Axetil (CXMA)            | 70.10% (47/67)                            |
| Cephalosporins (3rd generation) | Cefoperazone-Sulbactam (SFP)        | 4.50% (3/67)                              |
|                                 | Ceftriaxone (CRO)                   | 46.30% (31/67)                            |
| Cephalosporins (4th generation) | Cefepime (FEP)                      | 23.90% (16/67)                            |
| Other antibacterials            | Nitrofurantoin (NIT)                | 6.00% (4/67)                              |
| Quinolones                      | Ciprofloxacin (CIP)                 | 79.10% (53/67)                            |
|                                 | Nalidixic acid (NAL)                | 85.10% (57/67)                            |
| Trimethoprim                    | Trimethoprim/sulfamethoxazole (SXT) | 100.0% (67/67)                            |

**Table S3a: Degree of Agreement between phenotypic antimicrobial susceptibility tests and genotypic predicted antimicrobial resistance**

| drug            | Tests (N) | concordance (%) | TP | FP | TN | FN | specificity | Specificity lower limits | Specificity upper limits | sensitivity | Sensitivity lower limits | Sensitivity upper limits |
|-----------------|-----------|-----------------|----|----|----|----|-------------|--------------------------|--------------------------|-------------|--------------------------|--------------------------|
| Aminoglycosides | 67        | 55.22           | 37 | 30 | 0  | 0  | 0           | 0                        | 0.115703308              | 1           | 0.905109413              | 1                        |
| Beta-lactams    | 67        | 71.64           | 45 | 1  | 3  | 18 | 0.75        | 0.19412045               | 0.993690537              | 0.714285714 | 0.586538974              | 0.821070793              |
| Cephalosporins  | 67        | 68.66           | 46 | 20 | 0  | 1  | 0           | 0                        | 0.168433471              | 0.978723404 | 0.887062283              | 0.999461468              |
| Quinolones      | 67        | 86.57           | 56 | 7  | 2  | 2  | 0.222222222 | 0.028144973              | 0.600093574              | 0.965517241 | 0.880922689              | 0.995796353              |
| Trimethoprim    | 67        | 100             | 67 | 0  | 0  | 0  | NA          | 0                        | 1                        | 1           | 0.946430346              | 1                        |

Table S3b: List of genes predicted to confer resistance to antibiotics belonging to the drug classes in Table S3a

| <b>Drug Classes</b> | <b>AMR genes</b>                                                                                                                                                                                                                                                                              |
|---------------------|-----------------------------------------------------------------------------------------------------------------------------------------------------------------------------------------------------------------------------------------------------------------------------------------------|
| Aminoglycosides     | <i>aac(6')-Ie/aph(2'')-Ia, aac(6')-Ib-cr5, catB8/aac(6')-Ib', aac(6')-30/aac(6')-Ib', aac(3)-IIe, aac(3)-IId, aac(6')-Ib4, ant(2'')-Ia, aph(3')-Ia, aadA2, aph(3'')-Ib, aph(6)-Id, aadA5, aadA13, aadA1, aadA8</i>                                                                            |
| Beta-lactams        | <i>bla<sub>TEM-1</sub>, bla<sub>OXA-2</sub>, bla<sub>TEM-90</sub>, bla<sub>TEM-57</sub>, bla<sub>TEM-40</sub>, bla<sub>TEM-84</sub>, bla<sub>Z</sub>, bla<sub>R1</sub>, bla<sub>TEM-135</sub></i>                                                                                             |
| Cephalosporins      | <i>bla<sub>CTX-M-15</sub>, bla<sub>EC-15</sub>, bla<sub>EC-5</sub>, bla<sub>OXA-1</sub>, bla<sub>EC-16</sub>, bla<sub>EC-18</sub>, bla<sub>CTX-M-27</sub>, bla<sub>EC-8</sub>, bla<sub>CMY-2</sub>, bla<sub>EC-19</sub>, bla<sub>CMY-42</sub>, bla<sub>TEM-187</sub>, bla<sub>VEB-1</sub></i> |
| Quinolones          | <i>gyrA, parC, and parE mutations, qepA4, qnrS1, qepA8, qnrVC4</i>                                                                                                                                                                                                                            |
| Trimethoprim        | <i>dfrA12, dfrA17, dfrA7, dfrA14, dfrA29, dfrF, dfrB4, dfrA5, dfrA1</i>                                                                                                                                                                                                                       |

Supplementary Table 4: List of 159 Virulence-associated Genes (VAGs), Reference, and Accession Numbers

| VAGs      | Isolate No | Accession Numbers | Reference                                                                                                                           |
|-----------|------------|-------------------|-------------------------------------------------------------------------------------------------------------------------------------|
| entB      | 67         | WP_001007140      | <a href="http://www.mgc.ac.cn/cgi-bin/VFs/gene.cgi?GeneID=VFG000933">http://www.mgc.ac.cn/cgi-bin/VFs/gene.cgi?GeneID=VFG000933</a> |
| entC      | 67         | WP_001336900      | <a href="http://www.mgc.ac.cn/cgi-bin/VFs/gene.cgi?GeneID=VFG000931">http://www.mgc.ac.cn/cgi-bin/VFs/gene.cgi?GeneID=VFG000931</a> |
| fepA      | 67         | WP_001034892      | <a href="http://www.mgc.ac.cn/cgi-bin/VFs/gene.cgi?GeneID=VFG000923">http://www.mgc.ac.cn/cgi-bin/VFs/gene.cgi?GeneID=VFG000923</a> |
| fepB_1    | 67         | WP_001234311      | <a href="http://www.mgc.ac.cn/cgi-bin/VFs/gene.cgi?GeneID=VFG000924">http://www.mgc.ac.cn/cgi-bin/VFs/gene.cgi?GeneID=VFG000924</a> |
| fepC      | 67         | WP_000140634      | <a href="http://www.mgc.ac.cn/cgi-bin/VFs/gene.cgi?GeneID=VFG000925">http://www.mgc.ac.cn/cgi-bin/VFs/gene.cgi?GeneID=VFG000925</a> |
| fepG      | 67         | WP_000640938      | <a href="http://www.mgc.ac.cn/cgi-bin/VFs/gene.cgi?GeneID=VFG000928">http://www.mgc.ac.cn/cgi-bin/VFs/gene.cgi?GeneID=VFG000928</a> |
| fepD      | 66         | WP_001443194      | <a href="http://www.mgc.ac.cn/cgi-bin/VFs/gene.cgi?GeneID=VFG000926">http://www.mgc.ac.cn/cgi-bin/VFs/gene.cgi?GeneID=VFG000926</a> |
| entE_1    | 65         | WP_000026784      | <a href="http://www.mgc.ac.cn/cgi-bin/VFs/gene.cgi?GeneID=VFG000932">http://www.mgc.ac.cn/cgi-bin/VFs/gene.cgi?GeneID=VFG000932</a> |
| entS      | 65         | WP_001041793      | <a href="http://www.mgc.ac.cn/cgi-bin/VFs/gene.cgi?GeneID=VFG044165">http://www.mgc.ac.cn/cgi-bin/VFs/gene.cgi?GeneID=VFG044165</a> |
| fes_1     | 65         | WP_000125846      | <a href="http://www.mgc.ac.cn/cgi-bin/VFs/gene.cgi?GeneID=VFG044159">http://www.mgc.ac.cn/cgi-bin/VFs/gene.cgi?GeneID=VFG044159</a> |
| ompA_1    | 65         | AAF37887          | <a href="http://www.mgc.ac.cn/cgi-bin/VFs/gene.cgi?GeneID=VFG001443">http://www.mgc.ac.cn/cgi-bin/VFs/gene.cgi?GeneID=VFG001443</a> |
| yagV_ecpE | 60         | WP_001301550      | <a href="http://www.mgc.ac.cn/cgi-bin/VFs/gene.cgi?GeneID=VFG002417">http://www.mgc.ac.cn/cgi-bin/VFs/gene.cgi?GeneID=VFG002417</a> |
| yagW_ecpD | 60         | WP_001265657      | <a href="http://www.mgc.ac.cn/cgi-bin/VFs/gene.cgi?GeneID=VFG002416">http://www.mgc.ac.cn/cgi-bin/VFs/gene.cgi?GeneID=VFG002416</a> |
| yagZ_ecpA | 60         | WP_000730972      | <a href="http://www.mgc.ac.cn/cgi-bin/VFs/gene.cgi?GeneID=VFG002414">http://www.mgc.ac.cn/cgi-bin/VFs/gene.cgi?GeneID=VFG002414</a> |
| ykgK_ecpR | 60         | WP_000389022      | <a href="http://www.mgc.ac.cn/cgi-bin/VFs/gene.cgi?GeneID=VFG002413">http://www.mgc.ac.cn/cgi-bin/VFs/gene.cgi?GeneID=VFG002413</a> |
| yagY_ecpB | 59         | WP_000716386      | <a href="http://www.mgc.ac.cn/cgi-bin/VFs/gene.cgi?GeneID=VFG002412">http://www.mgc.ac.cn/cgi-bin/VFs/gene.cgi?GeneID=VFG002412</a> |
| yagX_ecpC | 58         | WP_001131063      | <a href="http://www.mgc.ac.cn/cgi-bin/VFs/gene.cgi?GeneID=VFG002415">http://www.mgc.ac.cn/cgi-bin/VFs/gene.cgi?GeneID=VFG002415</a> |
| gspL      | 55         | WP_000097229      | <a href="http://www.mgc.ac.cn/cgi-bin/VFs/gene.cgi?GeneID=VFG002055">http://www.mgc.ac.cn/cgi-bin/VFs/gene.cgi?GeneID=VFG002055</a> |
| fimF_1    | 54         | WP_001244821      | <a href="http://www.mgc.ac.cn/cgi-bin/VFs/gene.cgi?GeneID=VFG000877">http://www.mgc.ac.cn/cgi-bin/VFs/gene.cgi?GeneID=VFG000877</a> |
| fimG      | 54         | WP_000872015      | <a href="http://www.mgc.ac.cn/cgi-bin/VFs/gene.cgi?GeneID=VFG000878">http://www.mgc.ac.cn/cgi-bin/VFs/gene.cgi?GeneID=VFG000878</a> |
| fimH_1    | 54         | WP_000832235      | <a href="http://www.mgc.ac.cn/cgi-bin/VFs/gene.cgi?GeneID=VFG000879">http://www.mgc.ac.cn/cgi-bin/VFs/gene.cgi?GeneID=VFG000879</a> |
| gspK      | 54         | WP_000633233      | <a href="http://www.mgc.ac.cn/cgi-bin/VFs/gene.cgi?GeneID=VFG002054">http://www.mgc.ac.cn/cgi-bin/VFs/gene.cgi?GeneID=VFG002054</a> |
| fimC      | 53         | WP_000066579      | <a href="http://www.mgc.ac.cn/cgi-bin/VFs/gene.cgi?GeneID=VFG000875">http://www.mgc.ac.cn/cgi-bin/VFs/gene.cgi?GeneID=VFG000875</a> |
| fimE_2    | 53         | WP_000044711      | <a href="http://www.mgc.ac.cn/cgi-bin/VFs/gene.cgi?GeneID=VFG000872">http://www.mgc.ac.cn/cgi-bin/VFs/gene.cgi?GeneID=VFG000872</a> |
| fimD_3    | 52         | WP_000120946      | <a href="http://www.mgc.ac.cn/cgi-bin/VFs/gene.cgi?GeneID=VFG000876">http://www.mgc.ac.cn/cgi-bin/VFs/gene.cgi?GeneID=VFG000876</a> |
| fimI_1    | 52         | WP_000824100      | <a href="http://www.mgc.ac.cn/cgi-bin/VFs/gene.cgi?GeneID=VFG000874">http://www.mgc.ac.cn/cgi-bin/VFs/gene.cgi?GeneID=VFG000874</a> |
| gspC      | 50         | WP_000135089      | <a href="http://www.mgc.ac.cn/cgi-bin/VFs/gene.cgi?GeneID=VFG002046">http://www.mgc.ac.cn/cgi-bin/VFs/gene.cgi?GeneID=VFG002046</a> |
| gspF      | 50         | WP_001173470      | <a href="http://www.mgc.ac.cn/cgi-bin/VFs/gene.cgi?GeneID=VFG002049">http://www.mgc.ac.cn/cgi-bin/VFs/gene.cgi?GeneID=VFG002049</a> |
| gspD      | 49         | WP_000498818      | <a href="http://www.mgc.ac.cn/cgi-bin/VFs/gene.cgi?GeneID=VFG002047">http://www.mgc.ac.cn/cgi-bin/VFs/gene.cgi?GeneID=VFG002047</a> |
| gspG      | 49         | WP_001087302      | <a href="http://www.mgc.ac.cn/cgi-bin/VFs/gene.cgi?GeneID=VFG002050">http://www.mgc.ac.cn/cgi-bin/VFs/gene.cgi?GeneID=VFG002050</a> |
| gspM      | 49         |                   | <a href="http://www.mgc.ac.cn/cgi-bin/VFs/gene.cgi?GeneID=VFG002056">http://www.mgc.ac.cn/cgi-bin/VFs/gene.cgi?GeneID=VFG002056</a> |
| gspI      | 48         | WP_000820136      | <a href="http://www.mgc.ac.cn/cgi-bin/VFs/gene.cgi?GeneID=VFG002052">http://www.mgc.ac.cn/cgi-bin/VFs/gene.cgi?GeneID=VFG002052</a> |
| fimB_2    | 45         | WP_000790574      | <a href="http://www.mgc.ac.cn/cgi-bin/VFs/gene.cgi?GeneID=VFG000871">http://www.mgc.ac.cn/cgi-bin/VFs/gene.cgi?GeneID=VFG000871</a> |
| espX5     | 43         | WP_001270084      | <a href="http://www.mgc.ac.cn/cgi-bin/VFs/gene.cgi?GeneID=VFG034873">http://www.mgc.ac.cn/cgi-bin/VFs/gene.cgi?GeneID=VFG034873</a> |
| gspE      | 43         | WP_000249362      | <a href="http://www.mgc.ac.cn/cgi-bin/VFs/gene.cgi?GeneID=VFG002048">http://www.mgc.ac.cn/cgi-bin/VFs/gene.cgi?GeneID=VFG002048</a> |
| gspH      | 43         | WP_001115126      | <a href="http://www.mgc.ac.cn/cgi-bin/VFs/gene.cgi?GeneID=VFG002051">http://www.mgc.ac.cn/cgi-bin/VFs/gene.cgi?GeneID=VFG002051</a> |
| entD      | 40         | WP_001375021      | <a href="http://www.mgc.ac.cn/cgi-bin/VFs/gene.cgi?GeneID=VFG000929">http://www.mgc.ac.cn/cgi-bin/VFs/gene.cgi?GeneID=VFG000929</a> |
| fyuA      | 39         | WP_000784549      | <a href="http://www.mgc.ac.cn/cgi-bin/VFs/gene.cgi?GeneID=VFG012567">http://www.mgc.ac.cn/cgi-bin/VFs/gene.cgi?GeneID=VFG012567</a> |
| fdeC      | 38         | WP_000092542      | <a href="http://www.mgc.ac.cn/cgi-bin/VFs/gene.cgi?GeneID=VFG045349">http://www.mgc.ac.cn/cgi-bin/VFs/gene.cgi?GeneID=VFG045349</a> |
| ybtA      | 38         | WP_000970688      | <a href="http://www.mgc.ac.cn/cgi-bin/VFs/gene.cgi?GeneID=VFG012543">http://www.mgc.ac.cn/cgi-bin/VFs/gene.cgi?GeneID=VFG012543</a> |
| ybtE      | 38         |                   | <a href="http://www.mgc.ac.cn/cgi-bin/VFs/gene.cgi?GeneID=VFG012563">http://www.mgc.ac.cn/cgi-bin/VFs/gene.cgi?GeneID=VFG012563</a> |

|           |    |              |                                                                                                                                     |
|-----------|----|--------------|-------------------------------------------------------------------------------------------------------------------------------------|
| ybtP      | 38 | WP_001327262 | <a href="http://www.mgc.ac.cn/cgi-bin/VFs/gene.cgi?GeneID=VFG012539">http://www.mgc.ac.cn/cgi-bin/VFs/gene.cgi?GeneID=VFG012539</a> |
| ybtQ      | 38 | WP_001327263 | <a href="http://www.mgc.ac.cn/cgi-bin/VFs/gene.cgi?GeneID=VFG012535">http://www.mgc.ac.cn/cgi-bin/VFs/gene.cgi?GeneID=VFG012535</a> |
| ybtS      | 38 | WP_001327263 | <a href="http://www.mgc.ac.cn/cgi-bin/VFs/gene.cgi?GeneID=VFG012535">http://www.mgc.ac.cn/cgi-bin/VFs/gene.cgi?GeneID=VFG012535</a> |
| ybtT      | 38 | WP_000194283 | <a href="http://www.mgc.ac.cn/cgi-bin/VFs/gene.cgi?GeneID=VFG012559">http://www.mgc.ac.cn/cgi-bin/VFs/gene.cgi?GeneID=VFG012559</a> |
| ybtU      | 38 | WP_000194283 | <a href="http://www.mgc.ac.cn/cgi-bin/VFs/gene.cgi?GeneID=VFG012559">http://www.mgc.ac.cn/cgi-bin/VFs/gene.cgi?GeneID=VFG012559</a> |
| ybtX      | 38 | WP_001286281 | <a href="http://www.mgc.ac.cn/cgi-bin/VFs/gene.cgi?GeneID=VFG012531">http://www.mgc.ac.cn/cgi-bin/VFs/gene.cgi?GeneID=VFG012531</a> |
| irp1      | 36 | WP_000369487 | <a href="http://www.mgc.ac.cn/cgi-bin/VFs/gene.cgi?GeneID=VFG034120">http://www.mgc.ac.cn/cgi-bin/VFs/gene.cgi?GeneID=VFG034120</a> |
| irp2      | 33 | WP_000623043 | <a href="http://www.mgc.ac.cn/cgi-bin/VFs/gene.cgi?GeneID=VFG034104">http://www.mgc.ac.cn/cgi-bin/VFs/gene.cgi?GeneID=VFG034104</a> |
| espX1     | 29 | WP_000129338 | <a href="http://www.mgc.ac.cn/cgi-bin/VFs/gene.cgi?GeneID=VFG034849">http://www.mgc.ac.cn/cgi-bin/VFs/gene.cgi?GeneID=VFG034849</a> |
| iucC      | 29 | WP_001015709 | <a href="http://www.mgc.ac.cn/cgi-bin/VFs/gene.cgi?GeneID=VFG000938">http://www.mgc.ac.cn/cgi-bin/VFs/gene.cgi?GeneID=VFG000938</a> |
| iucB      | 28 | WP_001287497 | <a href="http://www.mgc.ac.cn/cgi-bin/VFs/gene.cgi?GeneID=VFG000939">http://www.mgc.ac.cn/cgi-bin/VFs/gene.cgi?GeneID=VFG000939</a> |
| chuA      | 27 | WP_000089583 | <a href="http://www.mgc.ac.cn/cgi-bin/VFs/gene.cgi?GeneID=VFG000917">http://www.mgc.ac.cn/cgi-bin/VFs/gene.cgi?GeneID=VFG000917</a> |
| chuS      | 27 | WP_001017192 | <a href="http://www.mgc.ac.cn/cgi-bin/VFs/gene.cgi?GeneID=VFG000916">http://www.mgc.ac.cn/cgi-bin/VFs/gene.cgi?GeneID=VFG000916</a> |
| chuT      | 27 | WP_001312167 | <a href="http://www.mgc.ac.cn/cgi-bin/VFs/gene.cgi?GeneID=VFG000918">http://www.mgc.ac.cn/cgi-bin/VFs/gene.cgi?GeneID=VFG000918</a> |
| chuU      | 27 | WP_000910402 | <a href="http://www.mgc.ac.cn/cgi-bin/VFs/gene.cgi?GeneID=VFG000922">http://www.mgc.ac.cn/cgi-bin/VFs/gene.cgi?GeneID=VFG000922</a> |
| chuV      | 27 | WP_000622316 | <a href="http://www.mgc.ac.cn/cgi-bin/VFs/gene.cgi?GeneID=VFG044172">http://www.mgc.ac.cn/cgi-bin/VFs/gene.cgi?GeneID=VFG044172</a> |
| chuW      | 27 | WP_001095619 | <a href="http://www.mgc.ac.cn/cgi-bin/VFs/gene.cgi?GeneID=VFG000919">http://www.mgc.ac.cn/cgi-bin/VFs/gene.cgi?GeneID=VFG000919</a> |
| chuX      | 27 | WP_000020034 | <a href="http://www.mgc.ac.cn/cgi-bin/VFs/gene.cgi?GeneID=VFG000920">http://www.mgc.ac.cn/cgi-bin/VFs/gene.cgi?GeneID=VFG000920</a> |
| chuY      | 27 | WP_000189356 | <a href="http://www.mgc.ac.cn/cgi-bin/VFs/gene.cgi?GeneID=VFG000921">http://www.mgc.ac.cn/cgi-bin/VFs/gene.cgi?GeneID=VFG000921</a> |
| papX      | 27 | WP_001298062 | <a href="http://www.mgc.ac.cn/cgi-bin/VFs/gene.cgi?GeneID=VFG001713">http://www.mgc.ac.cn/cgi-bin/VFs/gene.cgi?GeneID=VFG001713</a> |
| iucA      | 26 | WP_001299620 | <a href="http://www.mgc.ac.cn/cgi-bin/VFs/gene.cgi?GeneID=VFG000940">http://www.mgc.ac.cn/cgi-bin/VFs/gene.cgi?GeneID=VFG000940</a> |
| iutA_1    | 26 | WP_016265865 | <a href="http://www.mgc.ac.cn/cgi-bin/VFs/gene.cgi?GeneID=VFG000936">http://www.mgc.ac.cn/cgi-bin/VFs/gene.cgi?GeneID=VFG000936</a> |
| kpsD      | 25 | WP_001331697 | <a href="http://www.mgc.ac.cn/cgi-bin/VFs/gene.cgi?GeneID=VFG050159">http://www.mgc.ac.cn/cgi-bin/VFs/gene.cgi?GeneID=VFG050159</a> |
| papI      | 25 | WP_000006206 | <a href="http://www.mgc.ac.cn/cgi-bin/VFs/gene.cgi?GeneID=VFG000880">http://www.mgc.ac.cn/cgi-bin/VFs/gene.cgi?GeneID=VFG000880</a> |
| gspJ      | 23 | WP_000082782 | <a href="http://www.mgc.ac.cn/cgi-bin/VFs/gene.cgi?GeneID=VFG040938">http://www.mgc.ac.cn/cgi-bin/VFs/gene.cgi?GeneID=VFG040938</a> |
| papC      | 23 | WP_000654937 | <a href="http://www.mgc.ac.cn/cgi-bin/VFs/gene.cgi?GeneID=VFG000895">http://www.mgc.ac.cn/cgi-bin/VFs/gene.cgi?GeneID=VFG000895</a> |
| papD      | 23 | WP_000265729 | <a href="http://www.mgc.ac.cn/cgi-bin/VFs/gene.cgi?GeneID=VFG000896">http://www.mgc.ac.cn/cgi-bin/VFs/gene.cgi?GeneID=VFG000896</a> |
| papF      | 23 | WP_000113351 | <a href="http://www.mgc.ac.cn/cgi-bin/VFs/gene.cgi?GeneID=VFG000889">http://www.mgc.ac.cn/cgi-bin/VFs/gene.cgi?GeneID=VFG000889</a> |
| papJ      | 23 | WP_000261297 | <a href="http://www.mgc.ac.cn/cgi-bin/VFs/gene.cgi?GeneID=VFG000886">http://www.mgc.ac.cn/cgi-bin/VFs/gene.cgi?GeneID=VFG000886</a> |
| papK      | 23 | WP_000597713 | <a href="http://www.mgc.ac.cn/cgi-bin/VFs/gene.cgi?GeneID=VFG000887">http://www.mgc.ac.cn/cgi-bin/VFs/gene.cgi?GeneID=VFG000887</a> |
| papG      | 21 | WP_000758683 | <a href="http://www.mgc.ac.cn/cgi-bin/VFs/gene.cgi?GeneID=VFG000890">http://www.mgc.ac.cn/cgi-bin/VFs/gene.cgi?GeneID=VFG000890</a> |
| espL1     | 18 | WP_000081129 | <a href="http://www.mgc.ac.cn/cgi-bin/VFs/gene.cgi?GeneID=VFG034754">http://www.mgc.ac.cn/cgi-bin/VFs/gene.cgi?GeneID=VFG034754</a> |
| sat       | 17 | WP_001034089 | <a href="http://www.mgc.ac.cn/cgi-bin/VFs/gene.cgi?GeneID=VFG000902">http://www.mgc.ac.cn/cgi-bin/VFs/gene.cgi?GeneID=VFG000902</a> |
| cluster_3 | 15 |              |                                                                                                                                     |
| gnd       | 15 | WP_014907233 | <a href="http://www.mgc.ac.cn/cgi-bin/VFs/gene.cgi?GeneID=VFG048830">http://www.mgc.ac.cn/cgi-bin/VFs/gene.cgi?GeneID=VFG048830</a> |
| kpsM_1    | 15 | WP_000124301 | <a href="http://www.mgc.ac.cn/cgi-bin/VFs/gene.cgi?GeneID=VFG050169">http://www.mgc.ac.cn/cgi-bin/VFs/gene.cgi?GeneID=VFG050169</a> |
| senB      | 15 | WP_001020413 | <a href="http://www.mgc.ac.cn/cgi-bin/VFs/gene.cgi?GeneID=VFG036085">http://www.mgc.ac.cn/cgi-bin/VFs/gene.cgi?GeneID=VFG036085</a> |
| espL4     | 14 | WP_000627910 | <a href="http://www.mgc.ac.cn/cgi-bin/VFs/gene.cgi?GeneID=VFG034772">http://www.mgc.ac.cn/cgi-bin/VFs/gene.cgi?GeneID=VFG034772</a> |
| ugd       | 14 | WP_004175261 | <a href="http://www.mgc.ac.cn/cgi-bin/VFs/gene.cgi?GeneID=VFG048797">http://www.mgc.ac.cn/cgi-bin/VFs/gene.cgi?GeneID=VFG048797</a> |
| fimA      | 13 | WP_000695571 | <a href="http://www.mgc.ac.cn/cgi-bin/VFs/gene.cgi?GeneID=VFG000873">http://www.mgc.ac.cn/cgi-bin/VFs/gene.cgi?GeneID=VFG000873</a> |
| entF      | 11 | WP_000077767 | <a href="http://www.mgc.ac.cn/cgi-bin/VFs/gene.cgi?GeneID=VFG000930">http://www.mgc.ac.cn/cgi-bin/VFs/gene.cgi?GeneID=VFG000930</a> |
| espX4     | 11 | WP_000900547 | <a href="http://www.mgc.ac.cn/cgi-bin/VFs/gene.cgi?GeneID=VFG034866">http://www.mgc.ac.cn/cgi-bin/VFs/gene.cgi?GeneID=VFG034866</a> |
| papE      | 11 | WP_000723799 | <a href="http://www.mgc.ac.cn/cgi-bin/VFs/gene.cgi?GeneID=VFG000888">http://www.mgc.ac.cn/cgi-bin/VFs/gene.cgi?GeneID=VFG000888</a> |
| papH      | 11 | WP_001239363 | <a href="http://www.mgc.ac.cn/cgi-bin/VFs/gene.cgi?GeneID=VFG000894">http://www.mgc.ac.cn/cgi-bin/VFs/gene.cgi?GeneID=VFG000894</a> |
| iroD      | 10 | WP_000933673 | <a href="http://www.mgc.ac.cn/cgi-bin/VFs/gene.cgi?GeneID=VFG012505">http://www.mgc.ac.cn/cgi-bin/VFs/gene.cgi?GeneID=VFG012505</a> |
| iroE      | 10 | WP_000271272 | <a href="http://www.mgc.ac.cn/cgi-bin/VFs/gene.cgi?GeneID=VFG012501">http://www.mgc.ac.cn/cgi-bin/VFs/gene.cgi?GeneID=VFG012501</a> |

|        |    |              |                                                                                                                                     |
|--------|----|--------------|-------------------------------------------------------------------------------------------------------------------------------------|
| manC_1 | 10 | WP_003022279 | <a href="http://www.mgc.ac.cn/cgi-bin/VFs/gene.cgi?GeneID=VFG047006">http://www.mgc.ac.cn/cgi-bin/VFs/gene.cgi?GeneID=VFG047006</a> |
| espR1  | 9  | WP_000671689 | <a href="http://www.mgc.ac.cn/cgi-bin/VFs/gene.cgi?GeneID=VFG034815">http://www.mgc.ac.cn/cgi-bin/VFs/gene.cgi?GeneID=VFG034815</a> |
| hlyA   | 8  | WP_000217739 | <a href="http://www.mgc.ac.cn/cgi-bin/VFs/gene.cgi?GeneID=VFG000840">http://www.mgc.ac.cn/cgi-bin/VFs/gene.cgi?GeneID=VFG000840</a> |
| hlyB   | 8  | WP_000217739 | <a href="http://www.mgc.ac.cn/cgi-bin/VFs/gene.cgi?GeneID=VFG000840">http://www.mgc.ac.cn/cgi-bin/VFs/gene.cgi?GeneID=VFG000840</a> |
| hlyD_1 | 8  | WP_001213545 | <a href="http://www.mgc.ac.cn/cgi-bin/VFs/gene.cgi?GeneID=VFG000843">http://www.mgc.ac.cn/cgi-bin/VFs/gene.cgi?GeneID=VFG000843</a> |
| iroB   | 8  | WP_001221122 | <a href="http://www.mgc.ac.cn/cgi-bin/VFs/gene.cgi?GeneID=VFG012513">http://www.mgc.ac.cn/cgi-bin/VFs/gene.cgi?GeneID=VFG012513</a> |
| iroC   | 8  | WP_001111200 | <a href="http://www.mgc.ac.cn/cgi-bin/VFs/gene.cgi?GeneID=VFG012509">http://www.mgc.ac.cn/cgi-bin/VFs/gene.cgi?GeneID=VFG012509</a> |
| iroN   | 8  | WP_001222189 | <a href="http://www.mgc.ac.cn/cgi-bin/VFs/gene.cgi?GeneID=VFG000935">http://www.mgc.ac.cn/cgi-bin/VFs/gene.cgi?GeneID=VFG000935</a> |
| galF   | 7  | WP_001741945 | <a href="http://www.mgc.ac.cn/cgi-bin/VFs/gene.cgi?GeneID=VFG048990">http://www.mgc.ac.cn/cgi-bin/VFs/gene.cgi?GeneID=VFG048990</a> |
| astA   | 6  | AB042002.1   | <a href="https://www.ncbi.nlm.nih.gov/protein/BAA94855">https://www.ncbi.nlm.nih.gov/protein/BAA94855</a>                           |
| cpsACP | 6  | WP_014907219 | <a href="https://www.ncbi.nlm.nih.gov/protein/WP_014907219.1?">https://www.ncbi.nlm.nih.gov/protein/WP_014907219.1?</a>             |
| vat    | 6  | WP_001034006 | <a href="http://www.mgc.ac.cn/cgi-bin/VFs/gene.cgi?GeneID=VFG000904">http://www.mgc.ac.cn/cgi-bin/VFs/gene.cgi?GeneID=VFG000904</a> |
| clbP   | 5  | WP_002430641 | <a href="http://www.mgc.ac.cn/cgi-bin/VFs/gene.cgi?GeneID=VFG049162">http://www.mgc.ac.cn/cgi-bin/VFs/gene.cgi?GeneID=VFG049162</a> |
| clbQ   | 5  | WP_000065646 | <a href="http://www.mgc.ac.cn/cgi-bin/VFs/gene.cgi?GeneID=VFG049163">http://www.mgc.ac.cn/cgi-bin/VFs/gene.cgi?GeneID=VFG049163</a> |
| clbS   | 5  | WP_004175305 | <a href="http://www.mgc.ac.cn/cgi-bin/VFs/gene.cgi?GeneID=VFG049164">http://www.mgc.ac.cn/cgi-bin/VFs/gene.cgi?GeneID=VFG049164</a> |
| cnf1   | 5  | CAA50007     | <a href="http://www.mgc.ac.cn/cgi-bin/VFs/gene.cgi?GeneID=VFG001447">http://www.mgc.ac.cn/cgi-bin/VFs/gene.cgi?GeneID=VFG001447</a> |
| espY2  | 5  | WP_000868321 | <a href="http://www.mgc.ac.cn/cgi-bin/VFs/gene.cgi?GeneID=VFG034901">http://www.mgc.ac.cn/cgi-bin/VFs/gene.cgi?GeneID=VFG034901</a> |
| manB_1 | 5  | WP_004899416 | <a href="https://www.ncbi.nlm.nih.gov/protein/WP_004899416.1?">https://www.ncbi.nlm.nih.gov/protein/WP_004899416.1?</a>             |
| tcpC   | 5  | WP_000562556 | <a href="http://www.mgc.ac.cn/cgi-bin/VFs/gene.cgi?GeneID=VFG045464">http://www.mgc.ac.cn/cgi-bin/VFs/gene.cgi?GeneID=VFG045464</a> |
| clbA   | 4  | WP_001217110 | <a href="http://www.mgc.ac.cn/cgi-bin/VFs/gene.cgi?GeneID=VFG049147">http://www.mgc.ac.cn/cgi-bin/VFs/gene.cgi?GeneID=VFG049147</a> |
| clbB   | 4  | WP_041168941 | <a href="http://www.mgc.ac.cn/cgi-bin/VFs/gene.cgi?GeneID=VFG049148">http://www.mgc.ac.cn/cgi-bin/VFs/gene.cgi?GeneID=VFG049148</a> |
| clbC   | 4  | WP_041169023 | <a href="http://www.mgc.ac.cn/cgi-bin/VFs/gene.cgi?GeneID=VFG049149">http://www.mgc.ac.cn/cgi-bin/VFs/gene.cgi?GeneID=VFG049149</a> |
| clbD   | 4  | WP_000982270 | <a href="http://www.mgc.ac.cn/cgi-bin/VFs/gene.cgi?GeneID=VFG049150">http://www.mgc.ac.cn/cgi-bin/VFs/gene.cgi?GeneID=VFG049150</a> |
| clbE   | 4  | WP_001297917 | <a href="http://www.mgc.ac.cn/cgi-bin/VFs/gene.cgi?GeneID=VFG049151">http://www.mgc.ac.cn/cgi-bin/VFs/gene.cgi?GeneID=VFG049151</a> |
| clbF   | 4  | WP_000337350 | <a href="http://www.mgc.ac.cn/cgi-bin/VFs/gene.cgi?GeneID=VFG049152">http://www.mgc.ac.cn/cgi-bin/VFs/gene.cgi?GeneID=VFG049152</a> |
| clbG   | 4  | WP_000159201 | <a href="http://www.mgc.ac.cn/cgi-bin/VFs/gene.cgi?GeneID=VFG049153">http://www.mgc.ac.cn/cgi-bin/VFs/gene.cgi?GeneID=VFG049153</a> |
| clbH   | 4  | WP_014907257 | <a href="http://www.mgc.ac.cn/cgi-bin/VFs/gene.cgi?GeneID=VFG049154">http://www.mgc.ac.cn/cgi-bin/VFs/gene.cgi?GeneID=VFG049154</a> |
| clbI   | 4  | WP_000829570 | <a href="http://www.mgc.ac.cn/cgi-bin/VFs/gene.cgi?GeneID=VFG049155">http://www.mgc.ac.cn/cgi-bin/VFs/gene.cgi?GeneID=VFG049155</a> |
| clbL   | 4  | WP_001297937 | <a href="http://www.mgc.ac.cn/cgi-bin/VFs/gene.cgi?GeneID=VFG049158">http://www.mgc.ac.cn/cgi-bin/VFs/gene.cgi?GeneID=VFG049158</a> |
| clbM   | 4  | WP_014907260 | <a href="http://www.mgc.ac.cn/cgi-bin/VFs/gene.cgi?GeneID=VFG049159">http://www.mgc.ac.cn/cgi-bin/VFs/gene.cgi?GeneID=VFG049159</a> |
| clbN   | 4  | WP_001327259 | <a href="http://www.mgc.ac.cn/cgi-bin/VFs/gene.cgi?GeneID=VFG049160">http://www.mgc.ac.cn/cgi-bin/VFs/gene.cgi?GeneID=VFG049160</a> |
| clbO   | 4  | WP_001029878 | <a href="http://www.mgc.ac.cn/cgi-bin/VFs/gene.cgi?GeneID=VFG049161">http://www.mgc.ac.cn/cgi-bin/VFs/gene.cgi?GeneID=VFG049161</a> |
| draP   | 4  | AAK16479     | <a href="http://www.mgc.ac.cn/cgi-bin/VFs/gene.cgi?GeneID=VFG000946">http://www.mgc.ac.cn/cgi-bin/VFs/gene.cgi?GeneID=VFG000946</a> |
| espY1  | 4  | WP_001304001 | <a href="http://www.mgc.ac.cn/cgi-bin/VFs/gene.cgi?GeneID=VFG034895">http://www.mgc.ac.cn/cgi-bin/VFs/gene.cgi?GeneID=VFG034895</a> |
| focC   | 4  | WP_000975445 | <a href="http://www.mgc.ac.cn/cgi-bin/VFs/gene.cgi?GeneID=VFG000911">http://www.mgc.ac.cn/cgi-bin/VFs/gene.cgi?GeneID=VFG000911</a> |
| focF   | 4  | WP_000237770 | <a href="http://www.mgc.ac.cn/cgi-bin/VFs/gene.cgi?GeneID=VFG000913">http://www.mgc.ac.cn/cgi-bin/VFs/gene.cgi?GeneID=VFG000913</a> |
| focI   | 4  | WP_000703304 | <a href="http://www.mgc.ac.cn/cgi-bin/VFs/gene.cgi?GeneID=VFG000910">http://www.mgc.ac.cn/cgi-bin/VFs/gene.cgi?GeneID=VFG000910</a> |
| gtrA   | 4  | NP_706257    | <a href="http://www.mgc.ac.cn/cgi-bin/VFs/gene.cgi?GeneID=VFG000669">http://www.mgc.ac.cn/cgi-bin/VFs/gene.cgi?GeneID=VFG000669</a> |
| sfaB   | 4  | WP_000046976 | <a href="http://www.mgc.ac.cn/cgi-bin/VFs/gene.cgi?GeneID=VFG012329">http://www.mgc.ac.cn/cgi-bin/VFs/gene.cgi?GeneID=VFG012329</a> |
| sfaY   | 4  | WP_000012013 | <a href="http://www.mgc.ac.cn/cgi-bin/VFs/gene.cgi?GeneID=VFG042389">http://www.mgc.ac.cn/cgi-bin/VFs/gene.cgi?GeneID=VFG042389</a> |
| espY3  | 3  | WP_000978349 | <a href="http://www.mgc.ac.cn/cgi-bin/VFs/gene.cgi?GeneID=VFG034908">http://www.mgc.ac.cn/cgi-bin/VFs/gene.cgi?GeneID=VFG034908</a> |
| focH   | 3  | WP_001234179 | <a href="http://www.mgc.ac.cn/cgi-bin/VFs/gene.cgi?GeneID=VFG000915">http://www.mgc.ac.cn/cgi-bin/VFs/gene.cgi?GeneID=VFG000915</a> |
| hlyC   | 3  | WP_000839950 | <a href="http://www.mgc.ac.cn/cgi-bin/VFs/gene.cgi?GeneID=VFG000842">http://www.mgc.ac.cn/cgi-bin/VFs/gene.cgi?GeneID=VFG000842</a> |
| ibeA   | 3  | AAF98391     | <a href="http://www.mgc.ac.cn/cgi-bin/VFs/gene.cgi?GeneID=VFG001442">http://www.mgc.ac.cn/cgi-bin/VFs/gene.cgi?GeneID=VFG001442</a> |
| iucD   | 3  | WP_001299620 | <a href="http://www.mgc.ac.cn/cgi-bin/VFs/gene.cgi?GeneID=VFG000940">http://www.mgc.ac.cn/cgi-bin/VFs/gene.cgi?GeneID=VFG000940</a> |
| iutA   | 3  | WP_016265865 | <a href="http://www.mgc.ac.cn/cgi-bin/VFs/gene.cgi?GeneID=VFG000936">http://www.mgc.ac.cn/cgi-bin/VFs/gene.cgi?GeneID=VFG000936</a> |

|          |   |              |                                                                                                                                     |
|----------|---|--------------|-------------------------------------------------------------------------------------------------------------------------------------|
| afaA     | 2 | CAW30797     | <a href="http://www.mgc.ac.cn/cgi-bin/VFs/gene.cgi?GeneID=VFG042423">http://www.mgc.ac.cn/cgi-bin/VFs/gene.cgi?GeneID=VFG042423</a> |
| afaC_I   | 2 | CAW30799     | <a href="http://www.mgc.ac.cn/cgi-bin/VFs/gene.cgi?GeneID=VFG042425">http://www.mgc.ac.cn/cgi-bin/VFs/gene.cgi?GeneID=VFG042425</a> |
| afaD     | 2 | CAW30800     | <a href="http://www.mgc.ac.cn/cgi-bin/VFs/gene.cgi?GeneID=VFG042426">http://www.mgc.ac.cn/cgi-bin/VFs/gene.cgi?GeneID=VFG042426</a> |
| afaF_III | 2 | AAK16195     | <a href="http://www.mgc.ac.cn/cgi-bin/VFs/gene.cgi?GeneID=VFG042440">http://www.mgc.ac.cn/cgi-bin/VFs/gene.cgi?GeneID=VFG042440</a> |
| clbJ     | 2 | WP_077265119 | <a href="http://www.mgc.ac.cn/cgi-bin/VFs/gene.cgi?GeneID=VFG049156">http://www.mgc.ac.cn/cgi-bin/VFs/gene.cgi?GeneID=VFG049156</a> |
| clbK     | 2 | WP_014907259 | <a href="http://www.mgc.ac.cn/cgi-bin/VFs/gene.cgi?GeneID=VFG049157">http://www.mgc.ac.cn/cgi-bin/VFs/gene.cgi?GeneID=VFG049157</a> |
| espR-    | 2 | WP_000671689 | <a href="http://www.mgc.ac.cn/cgi-bin/VFs/gene.cgi?GeneID=VFG034815">http://www.mgc.ac.cn/cgi-bin/VFs/gene.cgi?GeneID=VFG034815</a> |
| espY4    | 2 | WP_000225947 | <a href="http://www.mgc.ac.cn/cgi-bin/VFs/gene.cgi?GeneID=VFG034915">http://www.mgc.ac.cn/cgi-bin/VFs/gene.cgi?GeneID=VFG034915</a> |
| kpsT_1   | 2 | WP_000590258 | <a href="http://www.mgc.ac.cn/cgi-bin/VFs/gene.cgi?GeneID=VFG050168">http://www.mgc.ac.cn/cgi-bin/VFs/gene.cgi?GeneID=VFG050168</a> |
| mrkJ     | 2 | WP_004149658 | <a href="http://www.mgc.ac.cn/cgi-bin/VFs/gene.cgi?GeneID=VFG048348">http://www.mgc.ac.cn/cgi-bin/VFs/gene.cgi?GeneID=VFG048348</a> |
| sfaH     | 2 | WP_001234182 | <a href="http://www.mgc.ac.cn/cgi-bin/VFs/gene.cgi?GeneID=VFG012343">http://www.mgc.ac.cn/cgi-bin/VFs/gene.cgi?GeneID=VFG012343</a> |
| aap_aspU | 1 | WP_000721278 | <a href="http://www.mgc.ac.cn/cgi-bin/VFs/gene.cgi?GeneID=VFG034574">http://www.mgc.ac.cn/cgi-bin/VFs/gene.cgi?GeneID=VFG034574</a> |
| afaE_III | 1 | CAA54121     | <a href="http://www.mgc.ac.cn/cgi-bin/VFs/gene.cgi?GeneID=VFG001425">http://www.mgc.ac.cn/cgi-bin/VFs/gene.cgi?GeneID=VFG001425</a> |
| aggB     | 1 | AAA57453     | <a href="http://www.mgc.ac.cn/cgi-bin/VFs/gene.cgi?GeneID=VFG000848">http://www.mgc.ac.cn/cgi-bin/VFs/gene.cgi?GeneID=VFG000848</a> |
| aggC     | 1 | AAA57452     | <a href="http://www.mgc.ac.cn/cgi-bin/VFs/gene.cgi?GeneID=VFG000849">http://www.mgc.ac.cn/cgi-bin/VFs/gene.cgi?GeneID=VFG000849</a> |
| aggD     | 1 | AAA57451     | <a href="http://www.mgc.ac.cn/cgi-bin/VFs/gene.cgi?GeneID=VFG000850">http://www.mgc.ac.cn/cgi-bin/VFs/gene.cgi?GeneID=VFG000850</a> |
| espX2    | 1 | WP_010904544 | <a href="http://www.mgc.ac.cn/cgi-bin/VFs/gene.cgi?GeneID=VFG034859">http://www.mgc.ac.cn/cgi-bin/VFs/gene.cgi?GeneID=VFG034859</a> |
| faeD     | 1 | WP_000761061 | <a href="http://www.mgc.ac.cn/cgi-bin/VFs/gene.cgi?GeneID=VFG042552">http://www.mgc.ac.cn/cgi-bin/VFs/gene.cgi?GeneID=VFG042552</a> |
| faeI     | 1 | WP_000758128 | <a href="http://www.mgc.ac.cn/cgi-bin/VFs/gene.cgi?GeneID=VFG042557">http://www.mgc.ac.cn/cgi-bin/VFs/gene.cgi?GeneID=VFG042557</a> |
| faeJ     | 1 | WP_000932014 | <a href="http://www.mgc.ac.cn/cgi-bin/VFs/gene.cgi?GeneID=VFG042558">http://www.mgc.ac.cn/cgi-bin/VFs/gene.cgi?GeneID=VFG042558</a> |
| focA     | 1 | WP_000768217 | <a href="http://www.mgc.ac.cn/cgi-bin/VFs/gene.cgi?GeneID=VFG000909">http://www.mgc.ac.cn/cgi-bin/VFs/gene.cgi?GeneID=VFG000909</a> |
| focD     | 1 | WP_001443207 | <a href="http://www.mgc.ac.cn/cgi-bin/VFs/gene.cgi?GeneID=VFG000912">http://www.mgc.ac.cn/cgi-bin/VFs/gene.cgi?GeneID=VFG000912</a> |
| focG     | 1 | WP_000767894 | <a href="http://www.mgc.ac.cn/cgi-bin/VFs/gene.cgi?GeneID=VFG000914">http://www.mgc.ac.cn/cgi-bin/VFs/gene.cgi?GeneID=VFG000914</a> |
| icaD     | 1 | WP_000240580 | <a href="http://www.mgc.ac.cn/cgi-bin/VFs/gene.cgi?GeneID=VFG001286">http://www.mgc.ac.cn/cgi-bin/VFs/gene.cgi?GeneID=VFG001286</a> |
| pic      | 1 | WP_001045652 | <a href="http://www.mgc.ac.cn/cgi-bin/VFs/gene.cgi?GeneID=VFG000903">http://www.mgc.ac.cn/cgi-bin/VFs/gene.cgi?GeneID=VFG000903</a> |
| sfaS     | 1 | WP_000767895 | <a href="http://www.mgc.ac.cn/cgi-bin/VFs/gene.cgi?GeneID=VFG012341">http://www.mgc.ac.cn/cgi-bin/VFs/gene.cgi?GeneID=VFG012341</a> |



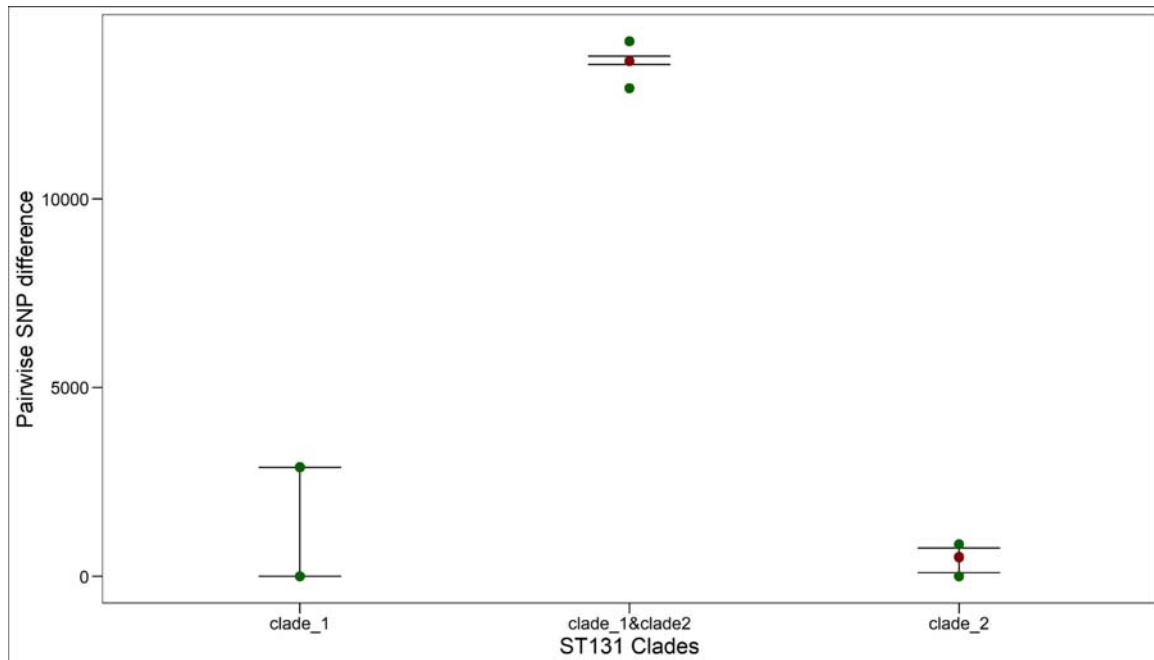

### Supplementary Figure 1

Interclade (ST131 clade 1 and ST131 clade 2) distance between lineage ST131 isolates is greater than 10000 SNPs. The “whisker” plot shows the 25<sup>th</sup> percentile (lower point; green), median (red point), and the 75<sup>th</sup> percentile (upper point; green) of the pairwise SNP distances within and between lineages.

a)

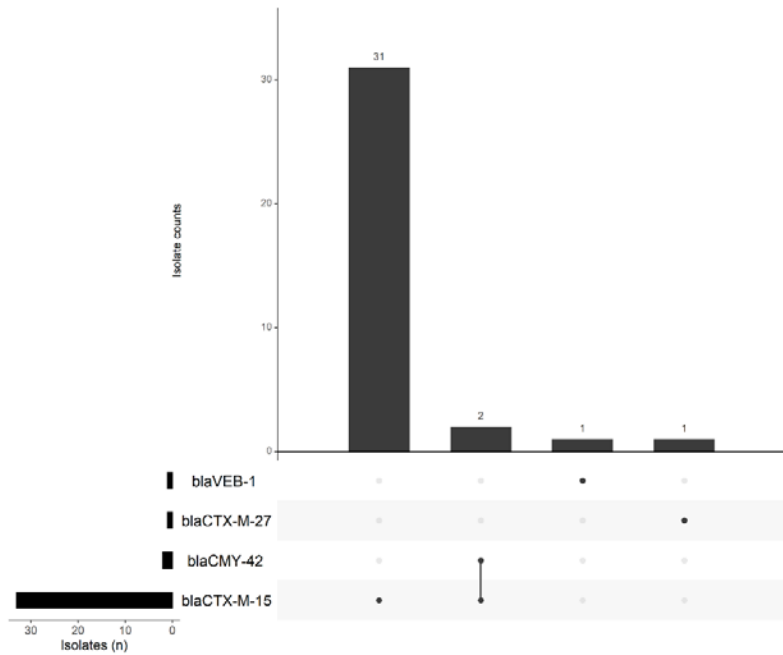

b.)

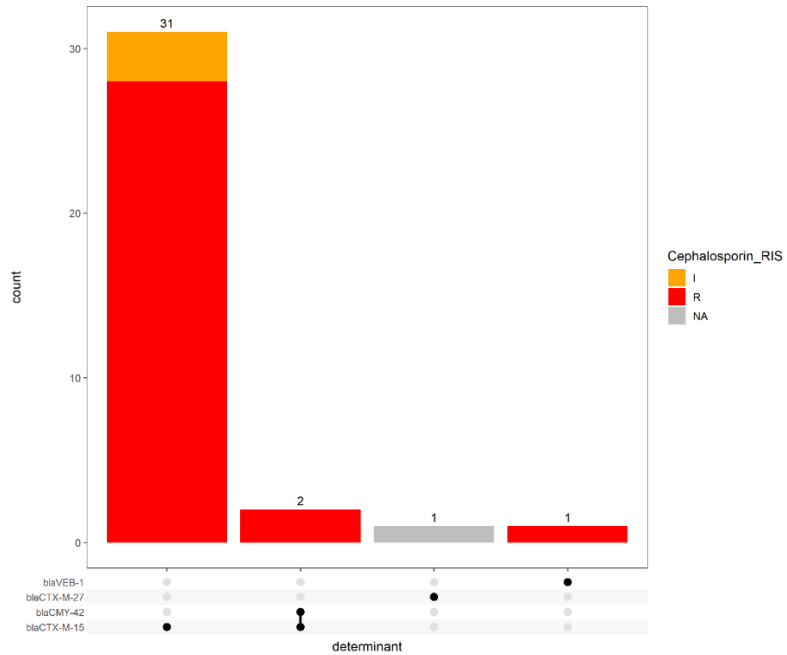

Supplementary Figure. 2: ESBL genes in ExPEC isolates. The upset plots demonstrate (a, b) the number of ExPEC isolates carrying each combination of genes conferring resistance to cephalosporins and (b), is coloured by the proportion of observed phenotypic antimicrobial susceptibility, and is ordered in descending order by the frequency of resistance gene profiles observed. The side bar chart (a) demonstrates the number of isolates that carry each of the resistance genes. The dots and lines between dots at the base of the main bar chart (and the right side of the side bar chart) show the co-resistance gene profile of the ExPEC isolates. From the legend of the coloured upset plot, NA means that there is no available data on phenotypic antimicrobial susceptibility data for the isolate.

Tree scale: 0.1

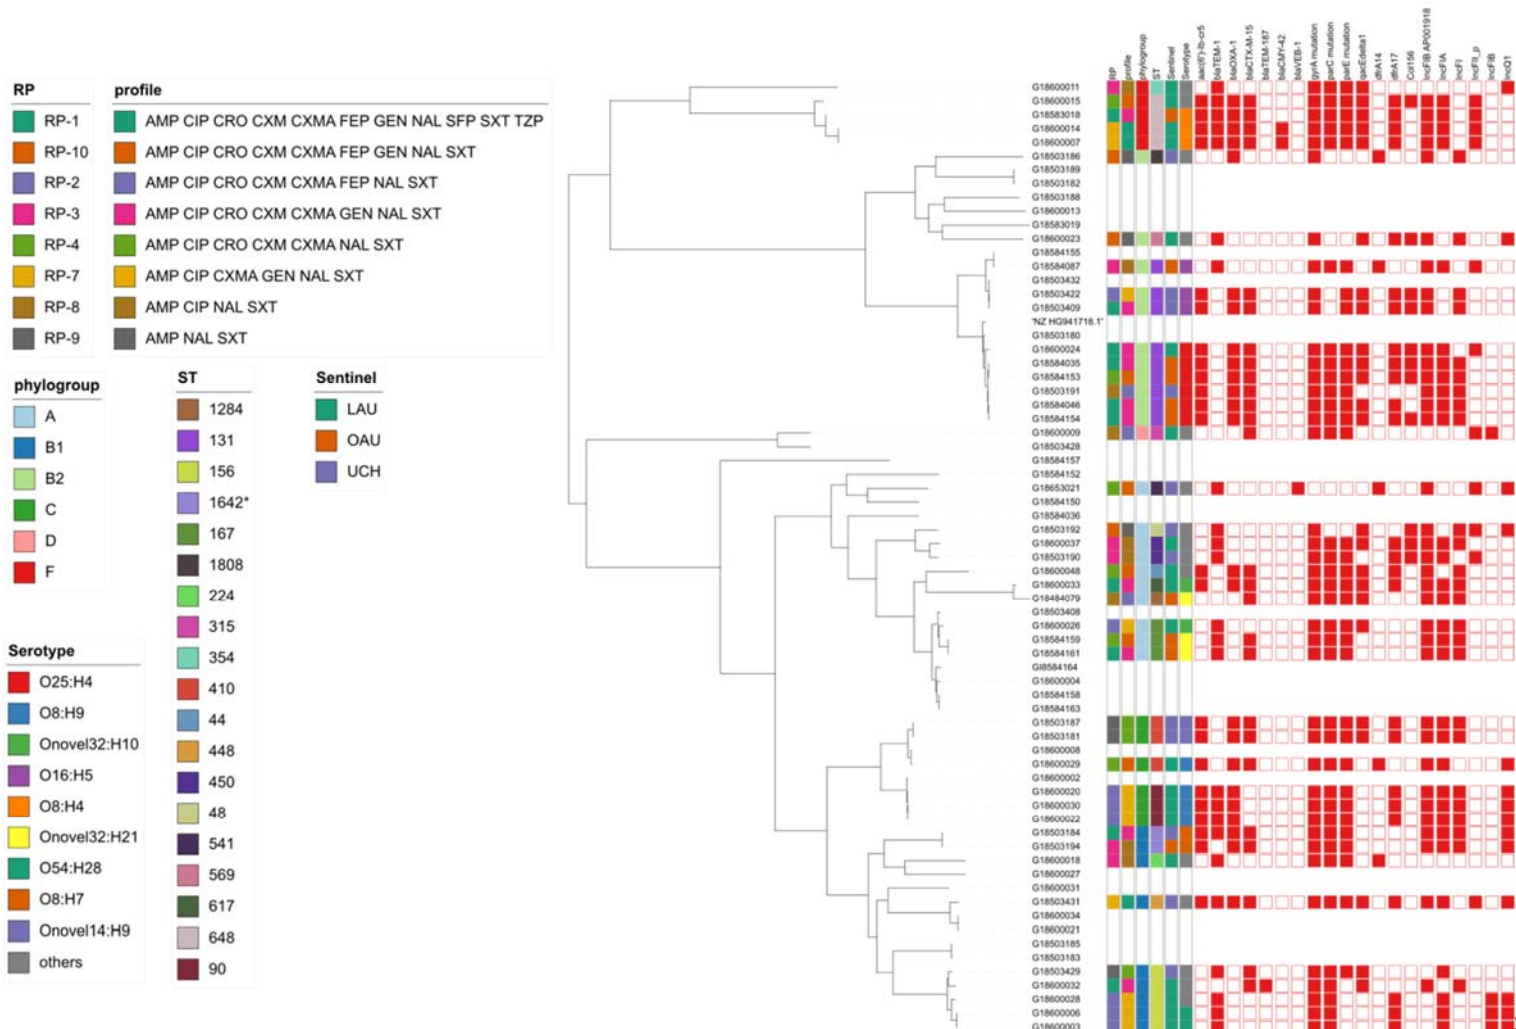

Supplementary Figure

3: Maximum likelihood SNP tree of bloodstream *E. coli* isolates sequenced for this study. Metadata for the 8 most common resistance profiles are

shown in this figure. For the AMR genes and plasmid replicons, red colour indicates presence of the gene.

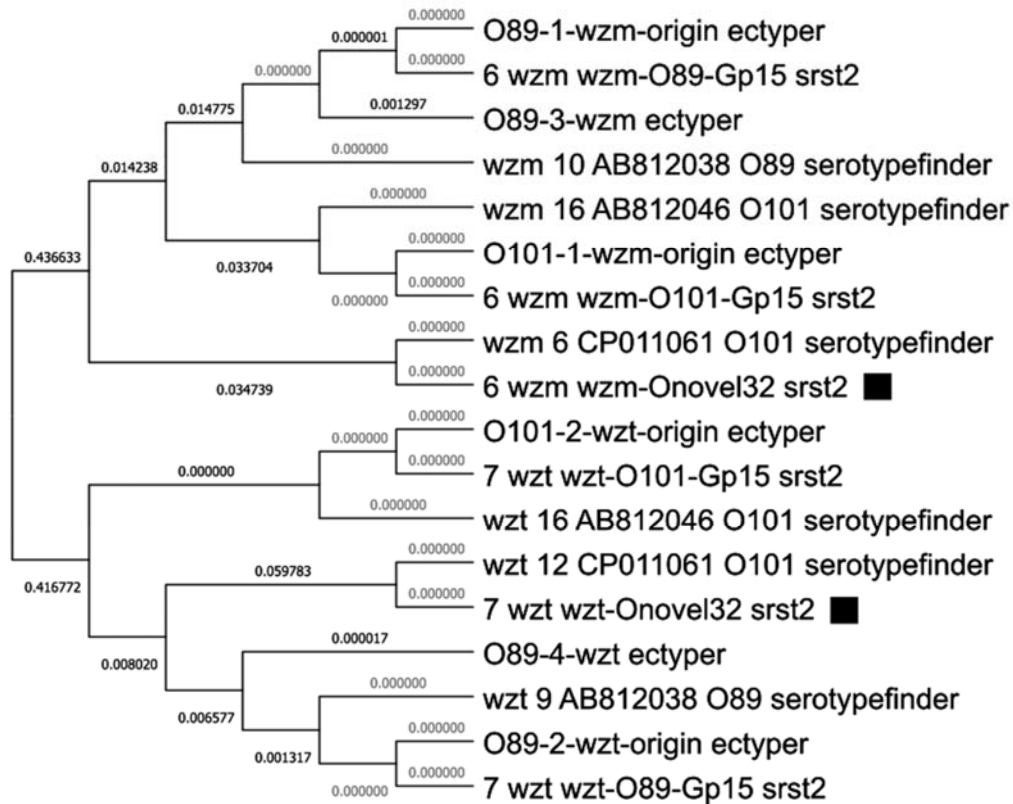

Supplementary Figure 4: Maximum Likelihood Tree showing that Onovel32 gene clusters are evolutionarily related to O101 and O89 gene clusters. The Onovel32 antigen gene clusters are indicated by the black rectangles. The evolutionary history was inferred by using the Maximum Likelihood method and Tamura-Nei model [73]. The tree with the highest log likelihood (-2571.09) is shown. Initial tree(s) for the heuristic search were obtained automatically by applying Neighbor-Join and BioNJ algorithms to a matrix of pairwise distances estimated using the Tamura-Nei model, and then selecting the topology with superior log likelihood value. This analysis involved 18 nucleotide sequences. There were a total of 869 positions in the final dataset. Evolutionary analyses were conducted in MEGA X [35].
